# Supplementary material for: ih-RIDME: a pulse EPR experiment to probe the heterogeneous nuclear environment
Source: Copernicus journal article supplement (doi:10.5194/mr-6-93-2025), 2025-03-10
Supplement: Supplementary file 1 [file mr-6-93-2025-supplement.zip]

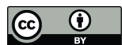

## *Supplement of*

# **ih-RIDME: a pulse EPR experiment to probe the heterogeneous nuclear environment**

**Sergei Kuzin et al.**

*Correspondence to:* Sergei Kuzin (skuzin@ethz.ch)

- [mr-6-93-2025-supplement-title-page.pdf](#)
- [mr-2024-19\\_supplement\\_part\\_1.pdf](#)
- [mr-2024-19\\_supplement\\_part\\_2.pdf](#)

The copyright of individual parts of the supplement might differ from the article licence.
